# Supplementary material for: NSF-mediated disassembly of on- and off-pathway SNARE complexes and inhibition by complexin
Source: eLife journal article supplement (doi:10.7554/elife.36497), 2018-07-09
Supplement: supp [file elife-36497-supp-v1.zip]

Archive with 25 entries (25 files):
- elife_poa_e36497_Figure_4_source_data_2.docx
- elife_poa_e36497_Figure_2_source_data_2.docx
- elife_poa_e36497_Figure_7_source_data_2.docx
- elife_poa_e36497_Figure_8_source_data_2.docx
- elife_poa_e36497_Figure_5_source_data_2.docx
- elife_poa_e36497_Figure_7_figure_supplement_1.pdf
- elife_poa_e36497_Figure_5_source_data_1.docx
- elife_poa_e36497_Figure_9_figure_supplement_1.pdf
- elife_poa_e36497_Figure_7_source_data_1.docx
- elife_poa_e36497_Figure_1_figure_supplement_1.pdf
- elife_poa_e36497_Figure_1_figure_supplement_2.pdf
- elife_poa_e36497_Figure_3_source_data_2.docx
- elife_poa_e36497_Figure_9_source_data_1.docx
- elife_poa_e36497_Figure_2_figure_supplement_1.pdf
- elife_poa_e36497_Figure_4_source_data_1.docx
- elife_poa_e36497_Figure_6_source_data_2.docx
- elife_poa_e36497_Transparent_Reporting_File.pdf
- elife_poa_e36497_Figure_6_source_data_1.docx
- elife_poa_e36497_Figure_3_source_data_1.docx
- elife_poa_e36497_Figure_6_figure_supplement_1.pdf
- elife_poa_e36497_Figure_2_source_data_1.docx
- elife_poa_e36497_Figure_3_source_data_3.docx
- elife_poa_e36497_Figure_9_source_data_2.docx
- elife_poa_e36497_Figure_8_source_data_1.docx
- elife_poa_e36497_Figure_3_source_data_4.docx
