# Supplementary material for: NSF-mediated disassembly of on- and off-pathway SNARE complexes and inhibition by complexin
Source: eLife journal article supplement (doi:10.7554/elife.36497), 2018-07-09
Supplement: supp [file elife-36497-supp-v1.zip › elife_poa_e36497_Figure_3_source_data_1.docx]

Figure 3––source data 1.

| NaCl concentration  (mM) | FRET label pairs | Percent of molecules without transitions | Percent of molecules  with transitions | Number of molecules  analyzed | Number of fields of view |
| --- | --- | --- | --- | --- | --- |
| 50 | SX-249:SB-82 | 2.8 ± 0.6 | 16.9 ± 2.8 | 3233 | 3 |
| 100 | SX-249:SB-82 | 5.5 ± 1.3 | 15.8 ± 4.3 | 2892 | 4 |
| 200 | SX-249:SB-82 | 7.6 ± 1.1 | 5.7 ± 1.4 | 3105 | 3 |
| 400 | SX-249:SB-82 | 16.2 ± 1.9 | 2.4 ± 0.4 | 3077 | 3 |
