# Supplementary material for: NSF-mediated disassembly of on- and off-pathway SNARE complexes and inhibition by complexin
Source: eLife journal article supplement (doi:10.7554/elife.36497), 2018-07-09
Supplement: supp [file elife-36497-supp-v1.zip › elife_poa_e36497_Figure_3_source_data_2.docx]

Figure 3––source data 2.

| NaCl concentration  (mM) | High FRET dwell time | | Low FRET dwell time | | Number of analyzed transitions |
| --- | --- | --- | --- | --- | --- |
| Long-lived state population (%) | Short-lived state population (%) | Long-lived state population (%) | Short-lived state population (%) |
| 50 | 74.3 ± 3.1 | 25.7 ± 3.1 | 79.3 ± 2.7 | 20.7 ± 2.7 | 2481 |
| 100 | 76.3 ± 1.8 | 23.7 ± 1.8 | 77.3 ± 1.0 | 22.7 ± 1.0 | 3066 |
| 200 | 73.7 ± 5.0 | 26.3 ± 5.0 | 67.3 ± 2.2 | 32.7 ± 2.2 | 926 |
| 400 | 81.1 ± 4.0 | 18.9 ± 4.0 | 40.8 ± 1.8 | 59.2 ± 1.8 | 285 |
