# Supplementary material for: NSF-mediated disassembly of on- and off-pathway SNARE complexes and inhibition by complexin
Source: eLife journal article supplement (doi:10.7554/elife.36497), 2018-07-09
Supplement: supp [file elife-36497-supp-v1.zip › elife_poa_e36497_Figure_3_source_data_3.docx]

Figure 3––source data 3.

| αSNAP  concentration  (µM) | FRET label pairs | Percent of molecules without transitions | Percent of molecules  with transitions | Number of molecules  analyzed | Number of fields of view |
| --- | --- | --- | --- | --- | --- |
| 0.5 | SX-249:SB-82 | 11.9 ± 2.0 | 1.7 ± 0.1 | 4868 | 3 |
| 5.0 | SX-249:SB-82 | 8.4 ± 1.2 | 4.2 ± 0.7 | 4358 | 3 |
| 10.0 | SX-249:SB-82 | 5.5 ± 1.3 | 15.8 ± 4.3 | 2892 | 4 |
| 20.0 | SX-249:SB-82 | 1.4 ± 0.2 | 19.0 ± 2.3 | 3084 | 3 |
