# Supplementary material for: NSF-mediated disassembly of on- and off-pathway SNARE complexes and inhibition by complexin
Source: eLife journal article supplement (doi:10.7554/elife.36497), 2018-07-09
Supplement: supp [file elife-36497-supp-v1.zip › elife_poa_e36497_Figure_3_source_data_4.docx]

Figure 3––source data 4.

| αSNAP  concentrations  (µM | High FRET dwell time | | Low FRET dwell time | | Number of analyzed transitions |
| --- | --- | --- | --- | --- | --- |
| Long-lived state population (%) | Short-lived state population (%) | Long-lived state population (%) | Short-lived state population (%) |
| 0.5 | 61.9 ± 3.4 | 38.1 ± 3.4 | 39.9 ± 11.4 | 60.1 ± 11.4 | 268 |
| 5.0 | 68.4 ± 3.5 | 31.6 ± 3.5 | 63.6 ± 6.2 | 36.4 ± 6.2 | 1266 |
| 10.0 | 76.3 ± 1.8 | 23.7 ± 1.8 | 77.3 ± 1.0 | 22.7 ± 1.0 | 3066 |
| 20.0 | 67.4 ± 0.2 | 32.6 ± 0.2 | 71.8 ± 5.3 | 28.2 ± 5.3 | 3490 |
