# Supplementary material for: NSF-mediated disassembly of on- and off-pathway SNARE complexes and inhibition by complexin
Source: eLife journal article supplement (doi:10.7554/elife.36497), 2018-07-09
Supplement: supp [file elife-36497-supp-v1.zip › elife_poa_e36497_Figure_4_source_data_1.docx]

Figure 4––source data 1.

| αSNAP  mutants | mutations | FRET label pairs | Percent of molecules without transitions | Percent of molecules with transitions | Number of molecules  analyzed | Number of fields of view |
| --- | --- | --- | --- | --- | --- | --- |
| WT | Wild type | SX-249:SB-82 | 5.5 ± 1.3 | 15.8 ± 4.3 | 2892 | 4 |
| KK | K122E, K163E | SX-249:SB-82 | 24.1 ± 2.1 | N.A. | 3896 | 3 |
| EEED | E39A, E40A, E43A, D80A | SX-249:SB-82 | 13.9 ± 1.9 | 6.0 ± 1.0 | 3867 | 3 |
