# Supplementary material for: NSF-mediated disassembly of on- and off-pathway SNARE complexes and inhibition by complexin
Source: eLife journal article supplement (doi:10.7554/elife.36497), 2018-07-09
Supplement: supp [file elife-36497-supp-v1.zip › elife_poa_e36497_Figure_5_source_data_1.docx]

Figure 5––source data 1.

| Construct | Syntaxin-1A residues | FRET label pairs | Percent of molecules without transitions | Percent of molecules with transitions | Number of molecules  analyzed | Number of fields of view |
| --- | --- | --- | --- | --- | --- | --- |
| L-SNARE-CC | 181-262 | SX-249:SB-82 | 5.5 ± 1.3 | 15.8 ± 4.3 | 2892 | 4 |
| L-SNAREfull-CC | 1-263 | SX-249:SB-82 | 6.83 ± 0.6 | 13.8 ± 1.7 | 2648 | 3 |
