# Supplementary material for: NSF-mediated disassembly of on- and off-pathway SNARE complexes and inhibition by complexin
Source: eLife journal article supplement (doi:10.7554/elife.36497), 2018-07-09
Supplement: supp [file elife-36497-supp-v1.zip › elife_poa_e36497_Figure_5_source_data_2.docx]

Figure 5––source data 2.

| Construct | High FRET dwell time | | Low FRET dwell time | | Number of analyzed transitions |
| --- | --- | --- | --- | --- | --- |
| Long-lived state population (%) | Short-lived state population (%) | Long-lived state population (%) | Short-lived state population (%) |
| L-SNARE-CC | 76.3 ± 1.8 | 23.7 ± 1.8 | 77.3 ± 1.0 | 22.7 ± 1.0 | 3066 |
| L-SNAREfull-CC | 71.0 ± 1.3 | 29 ± 1.3 | 78.1 ± 3.2 | 21.9 ± 3.2 | 1661 |
