# Supplementary material for: NSF-mediated disassembly of on- and off-pathway SNARE complexes and inhibition by complexin
Source: eLife journal article supplement (doi:10.7554/elife.36497), 2018-07-09
Supplement: supp [file elife-36497-supp-v1.zip › elife_poa_e36497_Figure_6_source_data_1.docx]

Figure 6––source data 1.

| Construct | FRET label pairs | Added  protein | Percent of molecules without transitions | Percent of molecules with transitions | Number of molecules  analyzed | Number of fields of view |
| --- | --- | --- | --- | --- | --- | --- |
| L-SNARE-CC | SX-249:SB-82 | None | 5.8 ± 0.7 | 15.5 ± 1.8 | 1420 | 3 |
| L-SNARE-CC | SX-249:SB-82 | 1 µM Cpx WT | 9.5 ± 1.1 | 8.5 ± 3.8 | 995 | 4 |
| L-SNARE-CC | SX-249:SB-82 | 10 µM Cpx WT | 15.0 ± 1.2 | 6.5 ± 2.4 | 2771 | 4 |
| L-SNARE-CC | SX-249:SB-82 | 10 µM Cpx 4M | 7.3 ± 1.2 | 9.3 ± 0.8 | 3812 | 3 |
