# Supplementary material for: NSF-mediated disassembly of on- and off-pathway SNARE complexes and inhibition by complexin
Source: eLife journal article supplement (doi:10.7554/elife.36497), 2018-07-09
Supplement: supp [file elife-36497-supp-v1.zip › elife_poa_e36497_Figure_6_source_data_2.docx]

Figure 6––source data 2.

| Added  protein | High FRET dwell time | | Low FRET dwell time | | Number of analyzed transitions |
| --- | --- | --- | --- | --- | --- |
| Long-lived state population (%) | Short-lived state population (%) | Long-lived state population (%) | Short-lived state population (%) |
| None | 81.4 ± 1.7 | 18.6 ± 1.7 | 71.1 ± 1.9 | 28.9 ± 1.9 | 2804 |
| 1 µM Cpx WT | 77.8 ± 11.2 | 22.2 ± 11.2 | 57.7 ± 13.7 | 42.3 ± 13.7 | 524 |
| 10 µM Cpx WT | 75.6 ± 12.0 | 24.4 ± 12.0 | 29.2 ± 5.2 | 70.8 ± 5.2 | 1434 |
| 10 µM Cpx 4M | 70.0 ± 5.6 | 30.0 ± 5.6 | 68.4 ± 3.8 | 31.6 ± 3.8 | 963 |
