# Supplementary material for: NSF-mediated disassembly of on- and off-pathway SNARE complexes and inhibition by complexin
Source: eLife journal article supplement (doi:10.7554/elife.36497), 2018-07-09
Supplement: supp [file elife-36497-supp-v1.zip › elife_poa_e36497_Figure_7_source_data_1.docx]

Figure 7––source data 1.

| Construct | FRET label pairs | Percent of molecules  without  transitions | Percent of molecules  with  transitions | Number of molecules  analyzed | Number of fields of view |
| --- | --- | --- | --- | --- | --- |
| L-SNAREbinary-CC1 | SX-249:S25-76 | 9.9 ± 1.3 | 9.5 ± 2.0 | 1994 | 5 |
| L-SNAREbinary-CC2 | SX-249:S25-197 | 8.4 ± 1.0 | 10.3 ± 1.4 | 2219 | 3 |
