# Supplementary material for: NSF-mediated disassembly of on- and off-pathway SNARE complexes and inhibition by complexin
Source: eLife journal article supplement (doi:10.7554/elife.36497), 2018-07-09
Supplement: supp [file elife-36497-supp-v1.zip › elife_poa_e36497_Figure_7_source_data_2.docx]

Figure 7––source data 2.

| Construct | High FRET dwell time | | Mid FRET dwell time | | Low FRET dwell time | | Number of analyzed transitions |
| --- | --- | --- | --- | --- | --- | --- | --- |
| Long-lived state population (%) | Short-lived state population (%) | Long-lived state population (%) | Short-lived state population (%) | Long-lived state population (%) | Short-lived state population (%) |
| L-SNAREbinary-CC1 | 83.6 ± 4.5 | 16.4 ± 4.5 | 57.8 ± 7.4 | 42.2 ± 7.4 | 71.9 ± 5.7 | 28.1 ± 5.7 | 2579 |
| L-SNAREbinary-CC2 | 82.4 ± 3.8 | 17.6 ± 3.8 | 63.9 ± 8.5 | 36.1 ± 8.5 | 65.5 ± 1.3 | 34.5 ± 1.3 | 3319 |
