# Supplementary material for: NSF-mediated disassembly of on- and off-pathway SNARE complexes and inhibition by complexin
Source: eLife journal article supplement (doi:10.7554/elife.36497), 2018-07-09
Supplement: supp [file elife-36497-supp-v1.zip › elife_poa_e36497_Figure_8_source_data_1.docx]

Figure 8––source data 1.

| Construct | FRET label pairs | Percent of molecules without transitions | Percent of molecules  with  transitions | Number of molecules  analyzed | Number of fields of view |
| --- | --- | --- | --- | --- | --- |
| L-SNARE-CC | SX-249:SB-82 | 5.5 ± 1.3 | 15.8 ± 4.3 | 2892 | 4 |
| L-SNARE-NN | SX-193:SB-28 | 16.7 ± 1.8 | 12.1 ± 2.4 | 1154 | 4 |
| L-SNAREternary-CC1 | SX-249:S25-76 | 8.9 ± 1.2 | 13.3 ± 1.3 | 3560 | 3 |
| L-SNAREternary-CC2 | SX-249:S25-197 | 12.2 ± 0.1 | 10.1 ± 1.6 | 2022 | 3 |
