# Supplementary material for: NSF-mediated disassembly of on- and off-pathway SNARE complexes and inhibition by complexin
Source: eLife journal article supplement (doi:10.7554/elife.36497), 2018-07-09
Supplement: supp [file elife-36497-supp-v1.zip › elife_poa_e36497_Figure_8_source_data_2.docx]

Figure 8––source data 2.

| Constructs | High FRET dwell time | | Low FRET dwell time | | Number of analyzed transitions |
| --- | --- | --- | --- | --- | --- |
| Long-lived state population (%) | Short-lived state population (%) | Long-lived state population (%) | Short-lived state population (%) |
| L-SNARE-CC | 76.3 ± 1.8 | 23.7 ± 1.8 | 77.3 ± 1.0 | 22.7 ± 1.0 | 3066 |
| L-SNARE-NN | 81.6 ± 3.3 | 18.4 ± 3.3 | 77.3 ± 2.3 | 22.7 ± 2.3 | 975 |
| L-SNAREternary-CC1 | 73.9 ± 2.0 | 26.1 ± 2.0 | 71.8 ± 2.4 | 28.2 ± 2.4 | 2851 |
| L-SNAREternary-CC2 | 78.6 ± 5.1 | 21.4 ± 5.1 | 79.3 ± 3.0 | 20.7 ± 3.0 | 785 |
