# Supplementary material for: NSF-mediated disassembly of on- and off-pathway SNARE complexes and inhibition by complexin
Source: eLife journal article supplement (doi:10.7554/elife.36497), 2018-07-09
Supplement: supp [file elife-36497-supp-v1.zip › elife_poa_e36497_Figure_9_source_data_1.docx]

Figure 9––source data 1.

| Construct | FRET label pairs | Percent of molecules without transitions | Percent of molecules with transitions | Number of molecules  analyzed | Number of fields of view |
| --- | --- | --- | --- | --- | --- |
| L-SNARE-CN | SX-249:SB-28 | 20.6 ± 1.3 | 8.6 ± 1.5 | 1853 | 3 |
