# Supplementary material for: NSF-mediated disassembly of on- and off-pathway SNARE complexes and inhibition by complexin
Source: eLife journal article supplement (doi:10.7554/elife.36497), 2018-07-09
Supplement: supp [file elife-36497-supp-v1.zip › elife_poa_e36497_Figure_9_source_data_2.docx]

Figure 9––source data 2.

| Construct | High FRET dwell time | | Low FRET dwell time | | Number of analyzed transitions |
| --- | --- | --- | --- | --- | --- |
| Long-lived state population (%) | Short-lived state population (%) | Long-lived state population (%) | Short-lived state population (%) |
| L-SNARE-CN | 45.8 ± 1.7 | 54.2 ± 1.7 | 76.3 ± 7.0 | 23.7 ± 7.0 | 895 |
