# Supplementary material for: NSF-mediated disassembly of on- and off-pathway SNARE complexes and inhibition by complexin
Source: eLife journal article supplement (doi:10.7554/elife.36497), 2018-07-09
Supplement: supp [file elife_poa_e36497_Figure_2_source_data_1.docx]

| Conditions | FRET label pairs | Percent of molecules without transitions | Percent of molecules with transitions | Number of molecules  analyzed | Number of fields of view |
| --- | --- | --- | --- | --- | --- |
| Alone  (none) | SX-249:SB-82 | 27.2 ± 2.6 | N.A. | 1774 | 3 |
| All  (NSF/αSNAP/ATP/MgCl2) | SX-249:SB-82 | 5.5 ± 1.3 | 15.8 ± 4.3 | 2892 | 4 |
| No αSNAP  (NSF/ATP/MgCl2) | SX-249:SB-82 | 35.8 ± 1.4 | N.A. | 1572 | 3 |
| No NSF  (αSNAP/ATP/MgCl2) | SX-249:SB-82 | 32.4 ± 5.3 | N.A. | 1714 | 3 |
| No MgCl2  (NSF/αSNAP/ATP) | SX-249:SB-82 | 31.1 ± 5.7 | N.A. | 1961 | 3 |

Figure 2––source data 1.
