# Supplementary figures and images for: NSF-mediated disassembly of on- and off-pathway SNARE complexes and inhibition by complexin
Source: eLife journal article supplement (doi:10.7554/elife.36497), 2018-07-09

Figure 7—figure supplement 1.

A.

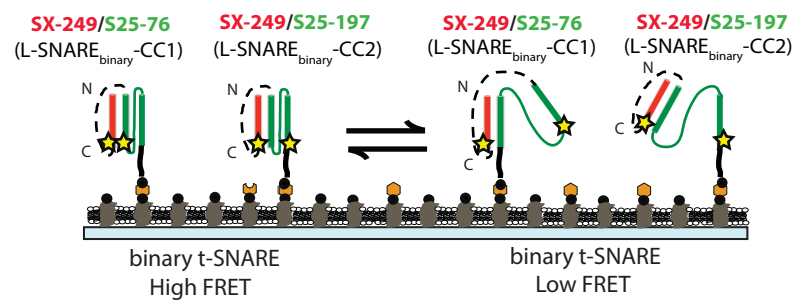

B.

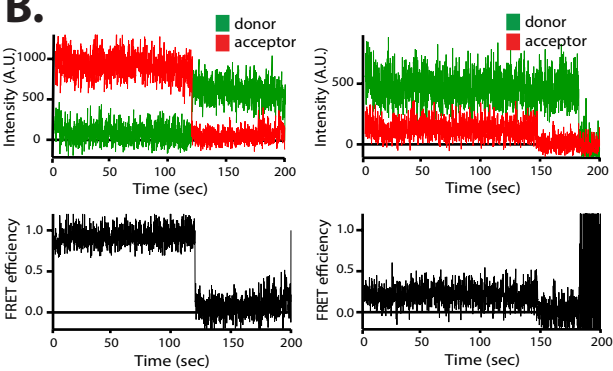

C.

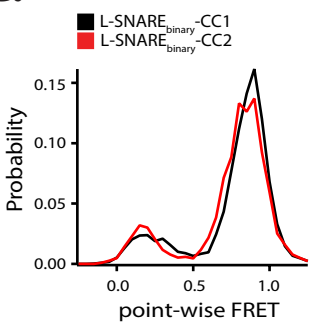

Supplement: supp [file elife-36497-supp-v1.zip › elife_poa_e36497_Figure_7_figure_supplement_1.pdf]

Figure 9—figure supplement 1.

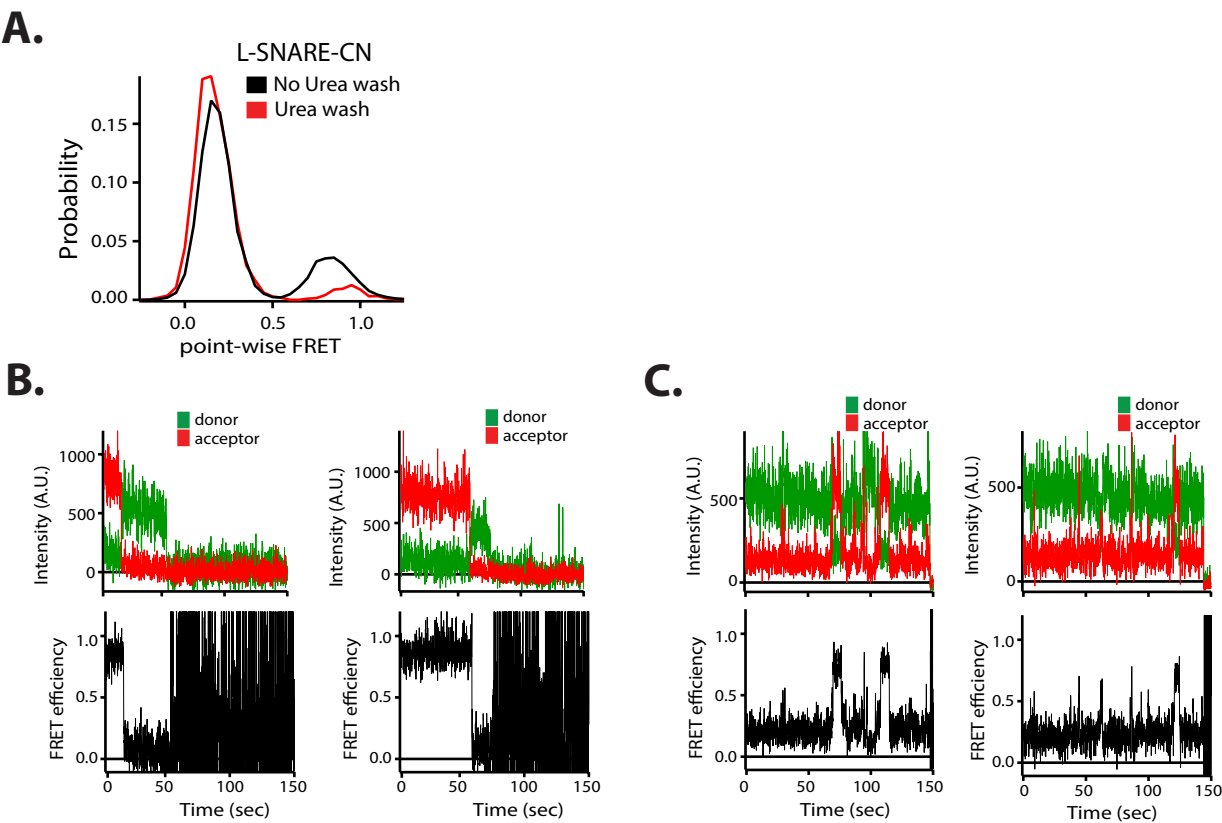

Supplement: supp [file elife-36497-supp-v1.zip › elife_poa_e36497_Figure_9_figure_supplement_1.pdf]

Figure 1—figure supplement 1.

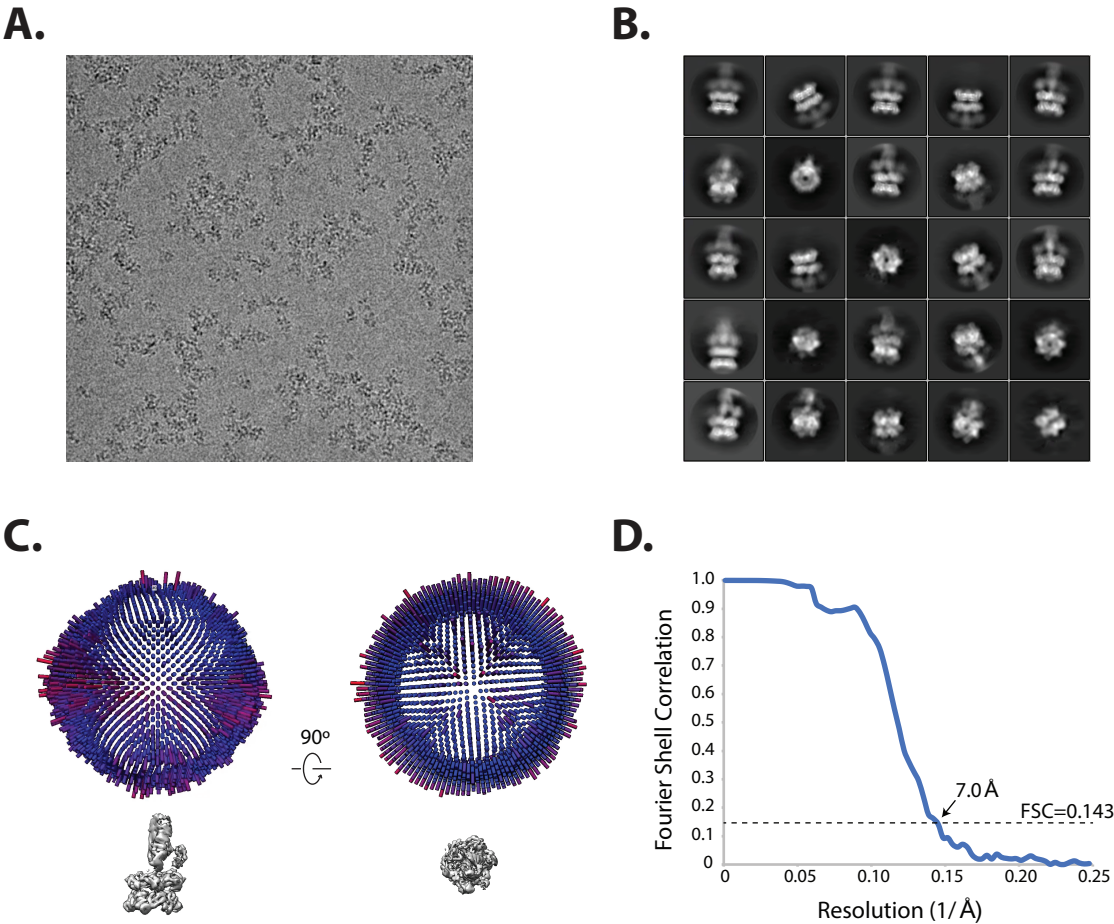

Supplement: supp [file elife-36497-supp-v1.zip › elife_poa_e36497_Figure_1_figure_supplement_1.pdf]

Figure 1—figure supplement 2.

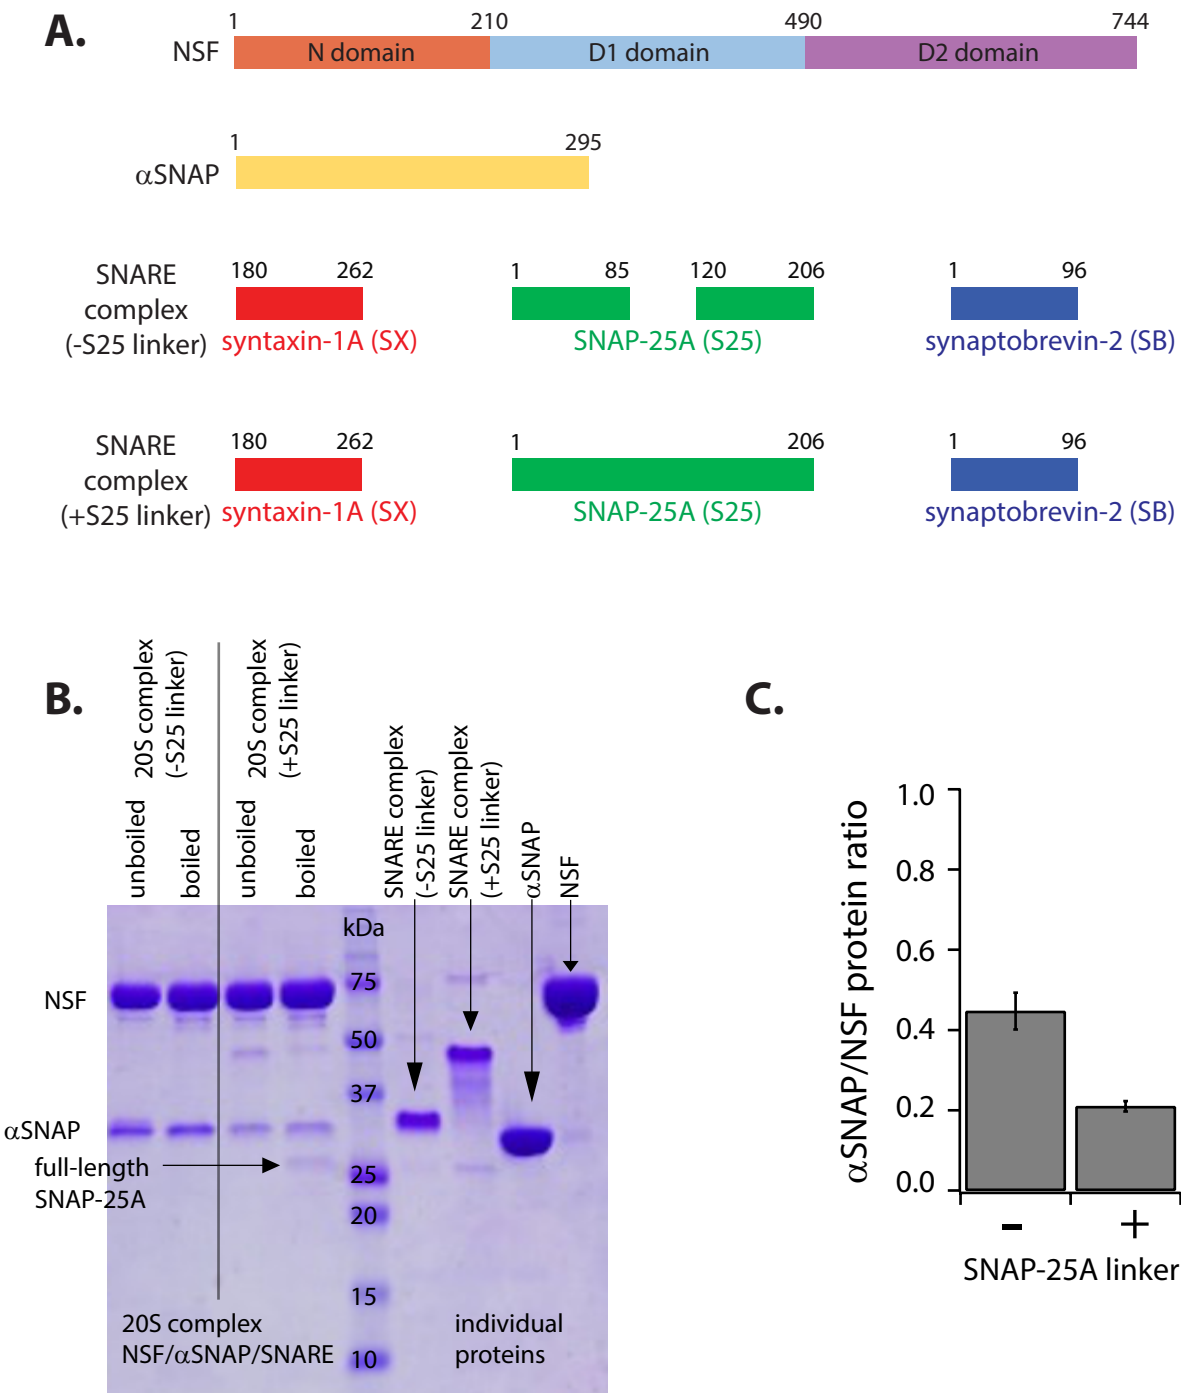

Supplement: supp [file elife-36497-supp-v1.zip › elife_poa_e36497_Figure_1_figure_supplement_2.pdf]

Figure 2—figure supplement 1.

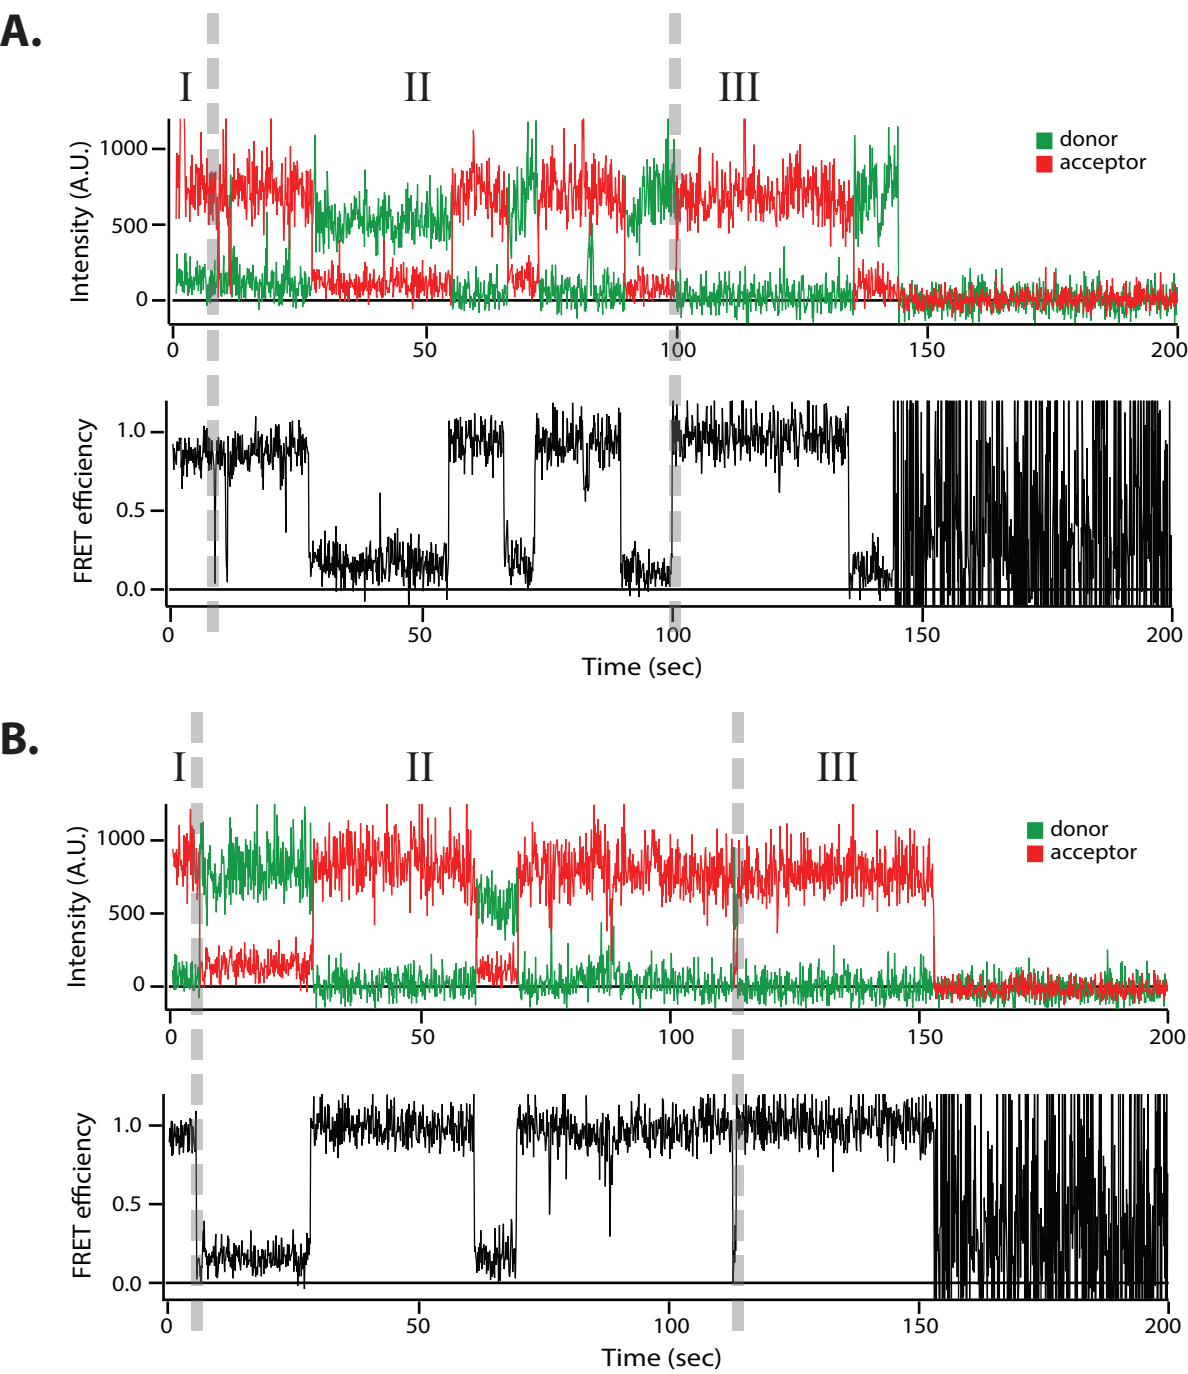

Supplement: supp [file elife-36497-supp-v1.zip › elife_poa_e36497_Figure_2_figure_supplement_1.pdf]

Figure 6—figure supplement 1.

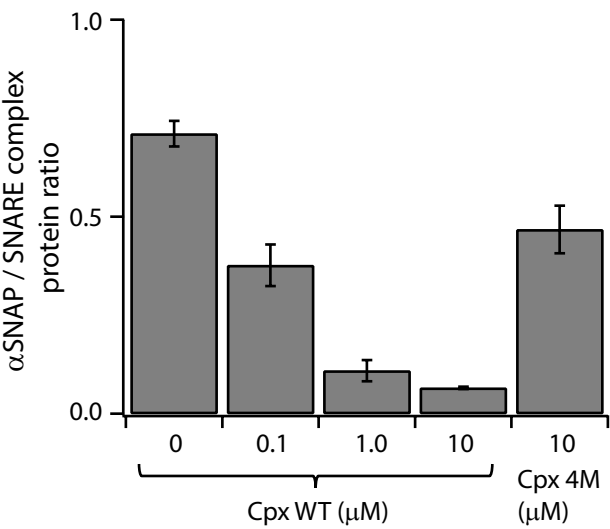

Supplement: supp [file elife-36497-supp-v1.zip › elife_poa_e36497_Figure_6_figure_supplement_1.pdf]
